# Supplementary material for: Let’s talk about PFAS: Inconsistent public awareness about PFAS and its sources in the United States
Source: PubMed Central journal article supplement (PMC10653490; doi:10.1371/journal.pone.0294134), 2023-11-16
Supplement: pone.0294134.s001.pdf [file pone.0294134.s001.pdf]

**Table S1. Unadjusted demographic characteristics of all survey respondents.**

| <b>Characteristic</b>                            | <b>n (%)*</b> |
|--------------------------------------------------|---------------|
| <b>Sex/Gender</b>                                |               |
| Male                                             | 529 (48%)     |
| Female                                           | 565 (51%)     |
| Other                                            | 4 (0.4%)      |
| No Answer                                        | 2 (0.2%)      |
| <b>Age</b>                                       |               |
| 18:24                                            | 125 (11%)     |
| 25:34                                            | 192 (17%)     |
| 35:44                                            | 204 (19%)     |
| 45:54                                            | 198 (18%)     |
| 55:64                                            | 171 (16%)     |
| 65+                                              | 208 (19%)     |
| No Answer                                        | 2 (0.2%)      |
| <b>Race/Ethnicity</b>                            |               |
| American Indian/Native American or Alaska Native | 15 (1.4%)     |
| Asian                                            | 49 (4.5%)     |
| Hispanic or Latino or Spanish Origin of any race | 109 (9.9%)    |
| Black or African American                        | 119 (11%)     |
| Native Hawaiian or Other Pacific Islander        | 3 (0.3%)      |
| White or Caucasian                               | 723 (66%)     |
| Other                                            | 21 (1.9%)     |
| Two or More                                      | 57 (5.2%)     |
| No Answer                                        | 4 (0.4%)      |
| <b>Educational Attainment</b>                    |               |
| Some high school                                 | 47 (4.3%)     |
| High school or GED                               | 418 (38%)     |
| Associate degree                                 | 178 (16%)     |
| Bachelor's degree                                | 246 (22%)     |
| Master's degree                                  | 132 (12%)     |
| Doctorate or terminal degree                     | 28 (2.5%)     |
| Other                                            | 40 (3.6%)     |
| No answer                                        | 11 (1.0%)     |

\*N = 1,100
