# Supplementary material for: Let’s talk about PFAS: Inconsistent public awareness about PFAS and its sources in the United States
Source: PubMed Central journal article supplement (PMC10653490; doi:10.1371/journal.pone.0294134), 2023-11-16
Supplement: pone.0294134.s002.pdf [file pone.0294134.s002.pdf]

**Table S2. Questions and response options used in survey instrument.**

| Questions                                                                                                                                                                                                                                                                                                                                                                                  | Response options                                                                                                                                                                                                                                                                    |
|--------------------------------------------------------------------------------------------------------------------------------------------------------------------------------------------------------------------------------------------------------------------------------------------------------------------------------------------------------------------------------------------|-------------------------------------------------------------------------------------------------------------------------------------------------------------------------------------------------------------------------------------------------------------------------------------|
| <b>What is your main source of drinking water?</b>                                                                                                                                                                                                                                                                                                                                         | <input type="checkbox"/> Unfiltered tap water<br><input type="checkbox"/> Filtered tap water<br><input type="checkbox"/> Bottled/prepackaged water<br><input type="checkbox"/> Other                                                                                                |
| <b>To your knowledge, has your primary source of drinking water been impacted by PFAS?</b>                                                                                                                                                                                                                                                                                                 | <input type="checkbox"/> Yes<br><input type="checkbox"/> No                                                                                                                                                                                                                         |
| <b>How concerned are you about PFAS being in your drinking water?</b>                                                                                                                                                                                                                                                                                                                      | <input type="checkbox"/> Not at all concerned<br><input type="checkbox"/> Slightly concerned<br><input type="checkbox"/> Moderately concerned<br><input type="checkbox"/> Very concerned<br><input type="checkbox"/> Extremely concerned                                            |
| <b>To your knowledge, has your community been exposed to PFAS?</b>                                                                                                                                                                                                                                                                                                                         | <input type="checkbox"/> Yes<br><input type="checkbox"/> No<br><input type="checkbox"/> Not sure                                                                                                                                                                                    |
| <b>How would you describe your knowledge about PFAS as an environmental contaminant?</b>                                                                                                                                                                                                                                                                                                   | <input type="checkbox"/> I've heard of it, and don't know what it is<br><input type="checkbox"/> I've heard of it or seen it somewhere, but don't know what it is<br><input type="checkbox"/> I think I know what it is<br><input type="checkbox"/> I'm confident I know what it is |
| <b>What percentage of the U.S. population do you think has been exposed to PFAS?</b>                                                                                                                                                                                                                                                                                                       | Scale, 0-100                                                                                                                                                                                                                                                                        |
| <p><b>* How familiar are you with the following items as potential sources of PFAS contamination?</b></p>                                                                                                                                                                                                                                                                                  |                                                                                                                                                                                                                                                                                     |
| Drinking water<br>Public waterways near waste disposal sites<br>Soils near waste disposal sites<br>Dairy products<br>Fresh produce<br>Freshwater fish<br>Seafood<br>Food packaging<br>Non-stick cookware<br>Personal hygiene products<br>Household products (fabrics, cleaning products, paints, and sealants)<br>Fire extinguishing foams<br>Fertilizers from wastewater treatment plants | <input type="checkbox"/> Not at all familiar<br><input type="checkbox"/> Slightly familiar<br><input type="checkbox"/> Moderately familiar<br><input type="checkbox"/> Very familiar<br><input type="checkbox"/> Extremely familiar                                                 |

---

**\* Please rate your intention to change your use of the following items because of their potential for PFAS contamination.**

Drinking water

Public waterways near waste disposal sites

Soils near waste disposal sites

Dairy products

Fresh produce

Freshwater fish

Seafood

Food packaging

Non-stick cookware

Personal hygiene products

Household products (fabrics, cleaning products, paints, and sealants)

Fire extinguishing foams

Fertilizers from wastewater treatment plants

- Will never change
- Might change
- Planning to change
- Have already changed
- Not sure

---

\*Matrix style question
